# Supplementary material
Source: publisher site journal article supplement (https://www.dovepress.com/article/487056)

**Mendelian randomization evidence for the causal effects of multi-site chronic pain on obstructive sleep apnea**

**Supplementary Material**

**Table S1**. SNPs before removing confounding factors.

**Table S2**. SNPs ultimately included in the Mendelian randomization analysis.

**Table S3**. Two-sample mendelian randomization estimates for the causal associations of obstructive sleep apnea on multi-site chronic pain.

**Table S4**. Potential confounding factors screened from Phenoscanner V2.

**Figure S1**. **a**. Leave-one-out of SNPs associated with multi-site chronic pain on obstructive sleep apnea; **b**. Funnel plot of SNPs associated with multi-site chronic pain on obstructive sleep apnea.

**Table S1**. SNPs before removing confounding factors.

| SNP | EA | OA | beta | se | eaf | pval | R2 | F | F Mean |
| --- | --- | --- | --- | --- | --- | --- | --- | --- | --- |
| rs10259354 | G | A | 0.0147 | 0.0026 | 0.2983 | 3.00E-08 | 9.05E-05 | 35.07075 | 41.43019 |
| rs10992729 | C | T | 0.0158 | 0.0026 | 0.3344 | 1.10E-09 | 0.000111 | 43.08325 | 41.43019 |
| rs11079993 | G | T | -0.0173 | 0.0025 | 0.3825 | 5.70E-12 | 0.000141 | 54.81361 | 41.43019 |
| rs11599236 | T | C | 0.0138 | 0.0025 | 0.4058 | 3.30E-08 | 9.18E-05 | 35.60485 | 41.43019 |
| rs11751591 | G | A | 0.0214 | 0.0034 | 0.1516 | 2.70E-10 | 0.000118 | 45.67147 | 41.43019 |
| rs11786084 | G | A | -0.0145 | 0.0026 | 0.3328 | 2.30E-08 | 9.34E-05 | 36.19781 | 41.43019 |
| rs12071912 | C | T | -0.0153 | 0.0026 | 0.3163 | 5.30E-09 | 0.000101 | 39.25166 | 41.43019 |
| rs12435797 | G | T | -0.0173 | 0.0031 | 0.1859 | 3.70E-08 | 9.06E-05 | 35.12005 | 41.43019 |
| rs12765185 | T | A | -0.0151 | 0.0027 | 0.2669 | 3.90E-08 | 8.92E-05 | 34.59162 | 41.43019 |
| rs13135092 | A | G | -0.0328 | 0.0044 | 0.08071 | 1.50E-13 | 0.00016 | 61.89611 | 41.43019 |
| rs13136239 | G | A | 0.0141 | 0.0026 | 0.3508 | 3.60E-08 | 9.06E-05 | 35.10606 | 41.43019 |
| rs1443914 | T | C | 0.0162 | 0.0024 | 0.475 | 2.80E-11 | 0.000131 | 50.74651 | 41.43019 |
| rs17474406 | G | A | -0.0492 | 0.0088 | 0.01805 | 2.40E-08 | 8.58E-05 | 33.26599 | 41.43019 |
| rs1946247 | T | G | -0.019 | 0.0035 | 0.1389 | 4.90E-08 | 8.64E-05 | 33.47858 | 41.43019 |
| rs197422 | C | A | -0.015 | 0.0025 | 0.3794 | 2.00E-09 | 0.000106 | 41.0775 | 41.43019 |
| rs2006281 | C | T | 0.0135 | 0.0024 | 0.4981 | 3.40E-08 | 9.11E-05 | 35.32704 | 41.43019 |
| rs2183271 | T | C | -0.014 | 0.0025 | 0.3578 | 3.10E-08 | 9.01E-05 | 34.91984 | 41.43019 |
| rs2386584 | T | G | -0.0166 | 0.0025 | 0.3825 | 2.80E-11 | 0.00013 | 50.46701 | 41.43019 |
| rs2424248 | G | A | 0.023 | 0.0037 | 0.1255 | 3.70E-10 | 0.000116 | 45.01695 | 41.43019 |
| rs28428925 | G | A | -0.0214 | 0.0035 | 0.1365 | 1.40E-09 | 0.000108 | 41.85389 | 41.43019 |
| rs285026 | G | T | -0.0138 | 0.0025 | 0.4297 | 1.90E-08 | 9.33E-05 | 36.18544 | 41.43019 |
| rs34811474 | G | A | 0.0192 | 0.0029 | 0.2285 | 2.70E-11 | 0.00013 | 50.39036 | 41.43019 |
| rs4852567 | A | G | 0.0149 | 0.0027 | 0.2834 | 4.30E-08 | 9.02E-05 | 34.95866 | 41.43019 |
| rs59898460 | T | C | 0.0169 | 0.0025 | 0.4044 | 9.20E-12 | 0.000138 | 53.34152 | 41.43019 |
| rs61883178 | C | A | -0.0208 | 0.0033 | 0.1696 | 2.00E-10 | 0.000122 | 47.24537 | 41.43019 |
| rs62098013 | G | A | -0.0169 | 0.0026 | 0.3631 | 4.00E-11 | 0.000132 | 51.21471 | 41.43019 |
| rs6770476 | C | T | -0.0154 | 0.0027 | 0.289 | 9.40E-09 | 9.75E-05 | 37.78484 | 41.43019 |
| rs6869446 | T | C | -0.0144 | 0.0025 | 0.3861 | 9.50E-09 | 9.83E-05 | 38.10935 | 41.43019 |
| rs6926377 | A | C | -0.0155 | 0.0027 | 0.294 | 7.90E-09 | 9.97E-05 | 38.66564 | 41.43019 |
| rs6966540 | T | C | -0.0139 | 0.0025 | 0.3762 | 3.30E-08 | 9.07E-05 | 35.15601 | 41.43019 |
| rs7628207 | T | C | 0.0195 | 0.0032 | 0.1766 | 8.40E-10 | 0.000111 | 42.87313 | 41.43019 |
| rs7798894 | A | T | 0.0153 | 0.0027 | 0.2888 | 1.60E-08 | 9.62E-05 | 37.28035 | 41.43019 |

EA, effect allele; OA, other allele

**Table S2**. SNPs ultimately included in the Mendelian randomization analysis.

| SNP | EA | OA | beta | se | eaf | pval | R2 | F | F Mean |
| --- | --- | --- | --- | --- | --- | --- | --- | --- | --- |
| rs10259354 | G | A | 0.0147 | 0.0026 | 0.2983 | 3.00E-08 | 9.05E-05 | 35.07075 | 40.63992 |
| rs10992729 | C | T | 0.0158 | 0.0026 | 0.3344 | 1.10E-09 | 0.000111 | 43.08325 | 40.63992 |
| rs11079993 | G | T | -0.0173 | 0.0025 | 0.3825 | 5.70E-12 | 0.000141 | 54.81361 | 40.63992 |
| rs11599236 | T | C | 0.0138 | 0.0025 | 0.4058 | 3.30E-08 | 9.18E-05 | 35.60485 | 40.63992 |
| rs11751591 | G | A | 0.0214 | 0.0034 | 0.1516 | 2.70E-10 | 0.000118 | 45.67147 | 40.63992 |
| rs11786084 | G | A | -0.0145 | 0.0026 | 0.3328 | 2.30E-08 | 9.34E-05 | 36.19781 | 40.63992 |
| rs12071912 | C | T | -0.0153 | 0.0026 | 0.3163 | 5.30E-09 | 0.000101 | 39.25166 | 40.63992 |
| rs12435797 | G | T | -0.0173 | 0.0031 | 0.1859 | 3.70E-08 | 9.06E-05 | 35.12005 | 40.63992 |
| rs12765185 | T | A | -0.0151 | 0.0027 | 0.2669 | 3.90E-08 | 8.92E-05 | 34.59162 | 40.63992 |
| rs1443914 | T | C | 0.0162 | 0.0024 | 0.475 | 2.80E-11 | 0.000131 | 50.74651 | 40.63992 |
| rs17474406 | G | A | -0.0492 | 0.0088 | 0.01805 | 2.40E-08 | 8.58E-05 | 33.26599 | 40.63992 |
| rs1946247 | T | G | -0.019 | 0.0035 | 0.1389 | 4.90E-08 | 8.64E-05 | 33.47858 | 40.63992 |
| rs2006281 | C | T | 0.0135 | 0.0024 | 0.4981 | 3.40E-08 | 9.11E-05 | 35.32704 | 40.63992 |
| rs2183271 | T | C | -0.014 | 0.0025 | 0.3578 | 3.10E-08 | 9.01E-05 | 34.91984 | 40.63992 |
| rs2386584 | T | G | -0.0166 | 0.0025 | 0.3825 | 2.80E-11 | 0.00013 | 50.46701 | 40.63992 |
| rs2424248 | G | A | 0.023 | 0.0037 | 0.1255 | 3.70E-10 | 0.000116 | 45.01695 | 40.63992 |
| rs28428925 | G | A | -0.0214 | 0.0035 | 0.1365 | 1.40E-09 | 0.000108 | 41.85389 | 40.63992 |
| rs285026 | G | T | -0.0138 | 0.0025 | 0.4297 | 1.90E-08 | 9.33E-05 | 36.18544 | 40.63992 |
| rs4852567 | A | G | 0.0149 | 0.0027 | 0.2834 | 4.30E-08 | 9.02E-05 | 34.95866 | 40.63992 |
| rs59898460 | T | C | 0.0169 | 0.0025 | 0.4044 | 9.20E-12 | 0.000138 | 53.34152 | 40.63992 |
| rs61883178 | C | A | -0.0208 | 0.0033 | 0.1696 | 2.00E-10 | 0.000122 | 47.24537 | 40.63992 |
| rs6869446 | T | C | -0.0144 | 0.0025 | 0.3861 | 9.50E-09 | 9.83E-05 | 38.10935 | 41.43019 |
| rs6926377 | A | C | -0.0155 | 0.0027 | 0.294 | 7.90E-09 | 9.97E-05 | 38.66564 | 41.43019 |
| rs6966540 | T | C | -0.0139 | 0.0025 | 0.3762 | 3.30E-08 | 9.07E-05 | 35.15601 | 41.43019 |
| rs7628207 | T | C | 0.0195 | 0.0032 | 0.1766 | 8.40E-10 | 0.000111 | 42.87313 | 41.43019 |
| rs7798894 | A | T | 0.0153 | 0.0027 | 0.2888 | 1.60E-08 | 9.62E-05 | 37.28035 | 41.43019 |

EA, effect allele; OA, other allele

**Table S3**. Two-sample mendelian randomization estimates for the causal associations of obstructive sleep apnea on multi-site chronic pain.

| Outcome | Exposure | Method | No. of SNPs or outliersa | OR (95% CI) | P |
| --- | --- | --- | --- | --- | --- |
| Multi-site chronic pain | OSA | IVW | 5 | 1.00 (0.96, 1.03) | 0.92 |
|  | MR Egger | 1.11 (0.94, 1.31) | 0.32 |
|  | Weighted median | 0.99 (0.95, 1.03) | 0.64 |
|  | Weighted mode | 0.98 (0.94, 1.02) | 0.46 |
|  | MR PRESSO | None | / | / |

aThe numbers of SNPs used as IVs in the IVW, weighted median, weighted mode and MR Egger methods and the number of outliers identified and excluded in the MR PRESSO method.

OSA, Obstructive Sleep Apnea.**Table S4**. Potential confounding factors screened from Phenoscanner V2.

| SNP | beta | se | pval | Trait | Detaset |
| --- | --- | --- | --- | --- | --- |
| rs11599236 | -0.00225 | 0.000502 | 7.62E-06 | Abdominal and pelvic pain | Neale-B_UKBB_EUR_2017 |
| rs11599236 | NA | NA | 4.16E-06 | Age first birth | Barban-N_AFB_EUR_2016 |
| rs13135092 | -0.03244 | 0.006786 | 1.75E-06 | Age started oral contraceptive pill | Neale-B_UKBB_EUR_2017 |
| rs11786084 | 0.01995 | 0.003785 | 1.36E-07 | Alcohol intake frequency | Neale-B_UKBB_EUR_2017 |
| rs13135092 | -0.04975 | 0.006469 | 1.48E-14 | Alcohol intake frequency | Neale-B_UKBB_EUR_2017 |
| rs13135092 | -0.042 | 0.004336 | 3.42E-22 | Arm fat mass left | Neale-B_UKBB_EUR_2017 |
| rs13136239 | -0.01386 | 0.002507 | 3.26E-08 | Arm fat mass left | Neale-B_UKBB_EUR_2017 |
| rs197422 | 0.01389 | 0.002454 | 1.51E-08 | Arm fat mass left | Neale-B_UKBB_EUR_2017 |
| rs13135092 | -0.04293 | 0.004334 | 3.98E-23 | Arm fat mass right | Neale-B_UKBB_EUR_2017 |
| rs13136239 | -0.01338 | 0.002507 | 9.50E-08 | Arm fat mass right | Neale-B_UKBB_EUR_2017 |
| rs197422 | 0.01345 | 0.002454 | 4.18E-08 | Arm fat mass right | Neale-B_UKBB_EUR_2017 |
| rs13135092 | -0.0383 | 0.003348 | 2.73E-30 | Arm fat percentage left | Neale-B_UKBB_EUR_2017 |
| rs13136239 | -0.0122 | 0.001936 | 2.96E-10 | Arm fat percentage left | Neale-B_UKBB_EUR_2017 |
| rs197422 | 0.008622 | 0.001896 | 5.42E-06 | Arm fat percentage left | Neale-B_UKBB_EUR_2017 |
| rs13135092 | -0.03869 | 0.003364 | 1.31E-30 | Arm fat percentage right | Neale-B_UKBB_EUR_2017 |
| rs13136239 | -0.01176 | 0.001945 | 1.50E-09 | Arm fat percentage right | Neale-B_UKBB_EUR_2017 |
| rs197422 | 0.008245 | 0.001592 | 2.24E-07 | Arm fat-free mass left | Neale-B_UKBB_EUR_2017 |
| rs197422 | 0.008502 | 0.00156 | 5.09E-08 | Arm fat-free mass right | Neale-B_UKBB_EUR_2017 |
| rs197422 | 0.008191 | 0.001586 | 2.42E-07 | Arm predicted mass left | Neale-B_UKBB_EUR_2017 |
| rs197422 | 0.008557 | 0.001555 | 3.74E-08 | Arm predicted mass right | Neale-B_UKBB_EUR_2017 |
| rs197422 | 0.009361 | 0.001661 | 1.73E-08 | Basal metabolic rate | Neale-B_UKBB_EUR_2017 |
| rs13135092 | -0.03627 | 0.003392 | 1.10E-26 | Body fat percentage | Neale-B_UKBB_EUR_2017 |
| rs13136239 | -0.01268 | 0.001961 | 1.03E-10 | Body fat percentage | Neale-B_UKBB_EUR_2017 |
| rs197422 | 0.008528 | 0.00192 | 8.94E-06 | Body fat percentage | Neale-B_UKBB_EUR_2017 |
| rs13135092 | -0.05005 | 0.004374 | 2.60E-30 | Body mass index | Neale-B_UKBB_EUR_2017 |
| rs13136239 | -0.01392 | 0.002531 | 3.76E-08 | Body mass index | Neale-B_UKBB_EUR_2017 |
| rs197422 | 0.01534 | 0.002477 | 6.00E-10 | Body mass index | Neale-B_UKBB_EUR_2017 |
| rs6770476 | -0.01407 | 0.002654 | 1.14E-07 | Body mass index | Neale-B_UKBB_EUR_2017 |
| rs13136239 | -0.3157 | 0.06974 | 6.00E-06 | Borderline personality disorder | EBI_GWAS_Catalog |
| rs13135092 | -0.01817 | 0.003028 | 1.96E-09 | Comparative body size at age 10 | Neale-B_UKBB_EUR_2017 |
| rs13135092 | 0.01377 | 0.003019 | 5.13E-06 | Comparative height size at age 10 | Neale-B_UKBB_EUR_2017 |
| rs6770476 | 0.01296 | 0.001832 | 1.49E-12 | Comparative height size at age 10 | Neale-B_UKBB_EUR_2017 |
| rs13135092 | -0.2215 | 0.0389 | 1.21E-08 | Crohns disease | IBDGC_Chrons-Disease_EUR_2015 |
| rs13135092 | 0.01118 | 0.002197 | 3.65E-07 | Current employment status: in paid employment or self-employed | Neale-B_UKBB_EUR_2017 |
| rs13136239 | -0.00224 | 0.000487 | 4.21E-06 | Current employment status: unable to work because of sickness or disability | Neale-B_UKBB_EUR_2017 |
| rs11599236 | -0.00644 | 0.001357 | 2.09E-06 | Current tobacco smoking | Neale-B_UKBB_EUR_2017 |
| rs13135092 | -0.01003 | 0.002188 | 4.61E-06 | Daytime dozing or sleeping | Neale-B_UKBB_EUR_2017 |
| rs13135092 | -0.00424 | 0.000948 | 7.86E-06 | Diabetes diagnosed by doctor | Neale-B_UKBB_EUR_2017 |
| rs13135092 | 0.03324 | 0.004481 | 1.19E-13 | Diastolic blood pressure | Neale-B_UKBB_EUR_2017 |
| rs13135092 | 0.01902 | 0.00371 | 2.98E-07 | Drive faster than motorway speed limit | Neale-B_UKBB_EUR_2017 |
| rs11599236 | -0.00727 | 0.001239 | 4.45E-09 | Fed-up feelings | Neale-B_UKBB_EUR_2017 |
| rs6770476 | -0.00658 | 0.001333 | 8.00E-07 | Fed-up feelings | Neale-B_UKBB_EUR_2017 |
| rs13135092 | 0.1164 | 0.01638 | 1.19E-12 | Fluid intelligence score | Neale-B_UKBB_EUR_2017 |
| rs13136239 | 0.01162 | 0.002409 | 1.42E-06 | Forced expiratory volume in 1-second, best measure | Neale-B_UKBB_EUR_2017 |
| rs13135092 | 0.02566 | 0.004968 | 2.41E-07 | Forced expiratory volume in 1-second, predicted | Neale-B_UKBB_EUR_2017 |
| rs6770476 | -0.00737 | 0.001654 | 8.33E-06 | Frequency of depressed mood in last 2 weeks | Neale-B_UKBB_EUR_2017 |
| rs11079993 | -0.00943 | 0.002098 | 6.96E-06 | Frequency of tiredness or lethargy in last 2 weeks | Neale-B_UKBB_EUR_2017 |
| rs6770476 | -0.01053 | 0.002246 | 2.75E-06 | Frequency of tiredness or lethargy in last 2 weeks | Neale-B_UKBB_EUR_2017 |
| rs6770476 | -0.00778 | 0.001615 | 1.45E-06 | Frequency of unenthusiasm or disinterest in last 2 weeks | Neale-B_UKBB_EUR_2017 |
| rs11079993 | 0.009137 | 0.001925 | 2.06E-06 | Getting up in morning | Neale-B_UKBB_EUR_2017 |
| rs13135092 | 0.01156 | 0.002516 | 4.36E-06 | Hair or balding pattern: pattern 4 | Neale-B_UKBB_EUR_2017 |
| rs13135092 | 0.02601 | 0.00319 | 3.50E-16 | Hand grip strength left | Neale-B_UKBB_EUR_2017 |
| rs13135092 | 0.02859 | 0.003195 | 3.64E-19 | Hand grip strength right | Neale-B_UKBB_EUR_2017 |
| rs13135092 | -0.00871 | 0.00187 | 3.19E-06 | Hayfever, allergic rhinitis or eczema | Neale-B_UKBB_EUR_2017 |
| rs13135092 | 0.129 | 0.01768 | 3.00E-13 | HDL cholesterol | NHGRI-EBI_GWAS_Catalog |
| rs6966540 | 0.02584 | 0.003214 | 9.20E-16 | Heel bone mineral density | Neale-B_UKBB_EUR_2017 |
| rs13135092 | 0.02394 | 0.003143 | 2.60E-14 | Height | Neale-B_UKBB_EUR_2017 |
| rs6770476 | 0.01923 | 0.001906 | 6.22E-24 | Height | Neale-B_UKBB_EUR_2017 |
| rs13135092 | -0.04468 | 0.006423 | 3.49E-12 | Hematocrit | Astle-W_Blood-Cell-Traits_EUR_2016 |
| rs13135092 | -0.04342 | 0.006453 | 1.71E-11 | Hemoglobin concentration | Astle-W_Blood-Cell-Traits_EUR_2016 |
| rs13135092 | -0.04007 | 0.00438 | 5.81E-20 | Hip circumference | Neale-B_UKBB_EUR_2017 |
| rs197422 | 0.01287 | 0.00248 | 2.13E-07 | Hip circumference | Neale-B_UKBB_EUR_2017 |
| rs13135092 | 0.009179 | 0.001843 | 6.37E-07 | Illnesses of siblings: none of the above, group 2 | Neale-B_UKBB_EUR_2017 |
| rs197422 | -0.0084 | 0.001769 | 2.07E-06 | Impedance of arm left | Neale-B_UKBB_EUR_2017 |
| rs6770476 | 0.01373 | 0.001894 | 4.18E-13 | Impedance of arm left | Neale-B_UKBB_EUR_2017 |
| rs12435797 | 0.01031 | 0.002206 | 2.98E-06 | Impedance of arm right | Neale-B_UKBB_EUR_2017 |
| rs197422 | -0.0095 | 0.001761 | 6.83E-08 | Impedance of arm right | Neale-B_UKBB_EUR_2017 |
| rs6770476 | 0.01387 | 0.001886 | 1.91E-13 | Impedance of arm right | Neale-B_UKBB_EUR_2017 |
| rs13135092 | 0.02948 | 0.004034 | 2.71E-13 | Impedance of leg left | Neale-B_UKBB_EUR_2017 |
| rs6770476 | 0.01256 | 0.002446 | 2.82E-07 | Impedance of leg left | Neale-B_UKBB_EUR_2017 |
| rs13135092 | 0.03124 | 0.004003 | 6.05E-15 | Impedance of leg right | Neale-B_UKBB_EUR_2017 |
| rs197422 | -0.01035 | 0.002266 | 4.98E-06 | Impedance of leg right | Neale-B_UKBB_EUR_2017 |
| rs6770476 | 0.01256 | 0.002427 | 2.27E-07 | Impedance of leg right | Neale-B_UKBB_EUR_2017 |
| rs13135092 | 0.01757 | 0.003374 | 1.90E-07 | Impedance of whole body | Neale-B_UKBB_EUR_2017 |
| rs197422 | -0.00898 | 0.00191 | 2.59E-06 | Impedance of whole body | Neale-B_UKBB_EUR_2017 |
| rs6770476 | 0.01379 | 0.002045 | 1.57E-11 | Impedance of whole body | Neale-B_UKBB_EUR_2017 |
| rs13135092 | 0.05116 | 0.01102 | 3.44E-06 | Intelligence | Sniekers-S_Intelligence_EUR_2017 |
| rs13135092 | -0.0313 | 0.003496 | 3.55E-19 | Leg fat mass left | Neale-B_UKBB_EUR_2017 |
| rs13136239 | -0.01022 | 0.002022 | 4.28E-07 | Leg fat mass left | Neale-B_UKBB_EUR_2017 |
| rs197422 | 0.01071 | 0.001979 | 6.19E-08 | Leg fat mass left | Neale-B_UKBB_EUR_2017 |
| rs13135092 | -0.03085 | 0.003537 | 2.75E-18 | Leg fat mass right | Neale-B_UKBB_EUR_2017 |
| rs13136239 | -0.01015 | 0.002045 | 6.92E-07 | Leg fat mass right | Neale-B_UKBB_EUR_2017 |
| rs197422 | 0.009895 | 0.002002 | 7.73E-07 | Leg fat mass right | Neale-B_UKBB_EUR_2017 |
| rs13135092 | -0.02687 | 0.002766 | 2.62E-22 | Leg fat percentage left | Neale-B_UKBB_EUR_2017 |
| rs13136239 | -0.00958 | 0.0016 | 2.14E-09 | Leg fat percentage left | Neale-B_UKBB_EUR_2017 |
| rs197422 | 0.007052 | 0.001566 | 6.70E-06 | Leg fat percentage left | Neale-B_UKBB_EUR_2017 |
| rs13135092 | -0.02582 | 0.002802 | 3.15E-20 | Leg fat percentage right | Neale-B_UKBB_EUR_2017 |
| rs13136239 | -0.00964 | 0.00162 | 2.74E-09 | Leg fat percentage right | Neale-B_UKBB_EUR_2017 |
| rs197422 | 0.008805 | 0.001649 | 9.32E-08 | Leg fat-free mass left | Neale-B_UKBB_EUR_2017 |
| rs197422 | 0.008899 | 0.001648 | 6.73E-08 | Leg fat-free mass right | Neale-B_UKBB_EUR_2017 |
| rs197422 | 0.008658 | 0.001638 | 1.25E-07 | Leg predicted mass left | Neale-B_UKBB_EUR_2017 |
| rs197422 | 0.008962 | 0.001638 | 4.44E-08 | Leg predicted mass right | Neale-B_UKBB_EUR_2017 |
| rs13135092 | -0.01141 | 0.0021 | 5.53E-08 | Long-standing illness, disability or infirmity | Neale-B_UKBB_EUR_2017 |
| rs13136239 | -0.00648 | 0.00127 | 3.28E-07 | Maternal smoking around birth | Neale-B_UKBB_EUR_2017 |
| rs11599236 | 0.006712 | 0.001249 | 7.65E-08 | Medication for pain relief, constipation, heartburn: none of the above | Neale-B_UKBB_EUR_2017 |
| rs11599236 | -0.00845 | 0.001236 | 8.41E-12 | Miserableness | Neale-B_UKBB_EUR_2017 |
| rs6770476 | -0.00623 | 0.00133 | 2.78E-06 | Miserableness | Neale-B_UKBB_EUR_2017 |
| rs11599236 | -0.00792 | 0.001258 | 3.15E-10 | Mood swings | Neale-B_UKBB_EUR_2017 |
| rs6770476 | -0.00477 | 0.001008 | 2.25E-06 | Mouth or teeth dental problems: dentures | Neale-B_UKBB_EUR_2017 |
| rs11599236 | -0.04871 | 0.008923 | 4.78E-08 | Neuroticism score | Neale-B_UKBB_EUR_2017 |
| rs6770476 | -0.04305 | 0.009613 | 7.53E-06 | Neuroticism score | Neale-B_UKBB_EUR_2017 |
| rs13135092 | 0.01089 | 0.002072 | 1.49E-07 | No blood clot, bronchitis, emphysema, asthma, rhinitis, eczema or allergy diagnosed by doctor | Neale-B_UKBB_EUR_2017 |
| rs11786084 | -0.01118 | 0.002525 | 9.56E-06 | Number of incorrect matches in round | Neale-B_UKBB_EUR_2017 |
| rs13136239 | -0.0091 | 0.002005 | 5.65E-06 | Number of operations | Neale-B_UKBB_EUR_2017 |
| rs13136239 | -0.00927 | 0.002052 | 6.29E-06 | Number of treatments or medications taken | Neale-B_UKBB_EUR_2017 |
| rs6926377 | NA | NA | 6.40E-06 | Oligoclonal band status in multiple sclerosis patients | GRASP |
| rs11079993 | -0.01041 | 0.00182 | 1.08E-08 | Overall health rating | Neale-B_UKBB_EUR_2017 |
| rs61883178 | 0.01053 | 0.002371 | 8.99E-06 | Overall health rating | Neale-B_UKBB_EUR_2017 |
| rs13135092 | -0.01777 | 0.003213 | 3.17E-08 | Overall health rating | Neale-B_UKBB_EUR_2017 |
| rs6770476 | -0.00915 | 0.001948 | 2.66E-06 | Overall health rating | Neale-B_UKBB_EUR_2017 |
| rs1946247 | 0.00516 | 0.001101 | 2.79E-06 | Pain type experienced in last month: hip pain | Neale-B_UKBB_EUR_2017 |
| rs13135092 | -0.00747 | 0.001399 | 9.13E-08 | Pain type experienced in last month: hip pain | Neale-B_UKBB_EUR_2017 |
| rs11079993 | -0.00694 | 0.001053 | 4.41E-11 | Pain type experienced in last month: neck or shoulder pain | Neale-B_UKBB_EUR_2017 |
| rs2424248 | -0.00737 | 0.001543 | 1.77E-06 | Pain type experienced in last month: neck or shoulder pain | Neale-B_UKBB_EUR_2017 |
| rs13135092 | -0.01059 | 0.00186 | 1.26E-08 | Pain type experienced in last month: neck or shoulder pain | Neale-B_UKBB_EUR_2017 |
| rs11079993 | 0.006555 | 0.001234 | 1.10E-07 | Pain type experienced in last month: none of the above | Neale-B_UKBB_EUR_2017 |
| rs11599236 | 0.006245 | 0.001229 | 3.73E-07 | Pain type experienced in last month: none of the above | Neale-B_UKBB_EUR_2017 |
| rs11786084 | -0.00598 | 0.001275 | 2.75E-06 | Pain type experienced in last month: none of the above | Neale-B_UKBB_EUR_2017 |
| rs2424248 | 0.00803 | 0.001808 | 8.97E-06 | Pain type experienced in last month: none of the above | Neale-B_UKBB_EUR_2017 |
| rs61883178 | -0.00757 | 0.001608 | 2.51E-06 | Pain type experienced in last month: none of the above | Neale-B_UKBB_EUR_2017 |
| rs13135092 | 0.01279 | 0.00218 | 4.42E-09 | Pain type experienced in last month: none of the above | Neale-B_UKBB_EUR_2017 |
| rs13136239 | 0.005627 | 0.00126 | 8.03E-06 | Pain type experienced in last month: none of the above | Neale-B_UKBB_EUR_2017 |
| rs197422 | -0.00618 | 0.001234 | 5.50E-07 | Pain type experienced in last month: none of the above | Neale-B_UKBB_EUR_2017 |
| rs13135092 | 0.042 | 0.00654 | 1.34E-10 | Platelet distribution width | Astle-W_Blood-Cell-Traits_EUR_2016 |
| rs13135092 | -0.02497 | 0.003931 | 2.11E-10 | Prospective memory result | Neale-B_UKBB_EUR_2017 |
| rs11786084 | -0.00752 | 0.001213 | 5.78E-10 | Qualifications: college or university degree | Neale-B_UKBB_EUR_2017 |
| rs13135092 | 0.01152 | 0.002075 | 2.82E-08 | Qualifications: college or university degree | Neale-B_UKBB_EUR_2017 |
| rs197422 | -0.00536 | 0.001174 | 4.95E-06 | Qualifications: college or university degree | Neale-B_UKBB_EUR_2017 |
| rs13135092 | -0.1447 | 0.0208 | 3.60E-12 | Schizophrenia | PGC_Schizophrenia_Mixed_2014 |
| rs11599236 | -0.00367 | 0.000794 | 3.77E-06 | Seen a psychiatrist for nerves, anxiety, tension or depression | Neale-B_UKBB_EUR_2017 |
| rs11599236 | -0.00639 | 0.001177 | 5.75E-08 | Seen doctor for nerves, anxiety, tension or depression | Neale-B_UKBB_EUR_2017 |
| rs13135092 | 0.009459 | 0.001941 | 1.09E-06 | Self-reported hypertension | Neale-B_UKBB_EUR_2017 |
| rs13135092 | -0.00916 | 0.001227 | 8.21E-14 | Self-reported osteoarthritis | Neale-B_UKBB_EUR_2017 |
| rs13135092 | -0.00142 | 0.000261 | 5.30E-08 | Self-reported urinary frequency or incontinence | Neale-B_UKBB_EUR_2017 |
| rs13135092 | -0.01103 | 0.002195 | 5.01E-07 | Sensitivity or hurt feelings | Neale-B_UKBB_EUR_2017 |
| rs13135092 | -0.02451 | 0.003419 | 7.61E-13 | Sitting height | Neale-B_UKBB_EUR_2017 |
| rs13135092 | 0.01894 | 0.003417 | 2.99E-08 | Sleep duration | Neale-B_UKBB_EUR_2017 |
| rs13135092 | -0.01254 | 0.002215 | 1.49E-08 | Taking other prescription medications | Neale-B_UKBB_EUR_2017 |
| rs13135092 | -0.02189 | 0.0034 | 1.21E-10 | Time spent watching television | Neale-B_UKBB_EUR_2017 |
| rs11599236 | -0.00445 | 0.000964 | 3.99E-06 | Treatment with paracetamol | Neale-B_UKBB_EUR_2017 |
| rs13135092 | -0.04292 | 0.004454 | 5.62E-22 | Trunk fat mass | Neale-B_UKBB_EUR_2017 |
| rs13136239 | -0.01378 | 0.002576 | 8.75E-08 | Trunk fat mass | Neale-B_UKBB_EUR_2017 |
| rs197422 | 0.0129 | 0.002521 | 3.11E-07 | Trunk fat mass | Neale-B_UKBB_EUR_2017 |
| rs13135092 | -0.04235 | 0.004066 | 2.15E-25 | Trunk fat percentage | Neale-B_UKBB_EUR_2017 |
| rs13136239 | -0.01454 | 0.002351 | 6.30E-10 | Trunk fat percentage | Neale-B_UKBB_EUR_2017 |
| rs197422 | 0.007061 | 0.001578 | 7.60E-06 | Trunk fat-free mass | Neale-B_UKBB_EUR_2017 |
| rs197422 | 0.007076 | 0.001572 | 6.79E-06 | Trunk predicted mass | Neale-B_UKBB_EUR_2017 |
| rs13135092 | 0.011 | 0.002223 | 7.47E-07 | Types of physical activity in last 4 weeks: other exercises | Neale-B_UKBB_EUR_2017 |
| rs13135092 | 0.007809 | 0.001345 | 6.44E-09 | Types of physical activity in last 4 weeks: strenuous sports | Neale-B_UKBB_EUR_2017 |
| rs13135092 | 0.005148 | 0.001138 | 6.09E-06 | Types of transport used, excluding work: cycle | Neale-B_UKBB_EUR_2017 |
| rs13135092 | 0.02336 | 0.002702 | 5.42E-18 | Usual walking pace | Neale-B_UKBB_EUR_2017 |
| rs13135092 | 0.009338 | 0.001967 | 2.07E-06 | Vascular or heart problems diagnosed by doctor: high blood pressure | Neale-B_UKBB_EUR_2017 |
| rs13135092 | -0.02425 | 0.003918 | 6.01E-10 | Waist circumference | Neale-B_UKBB_EUR_2017 |
| rs13136239 | -0.01132 | 0.002266 | 5.90E-07 | Waist circumference | Neale-B_UKBB_EUR_2017 |
| rs197422 | 0.02 | 0.0044 | 3.50E-06 | Waist circumference | GIANT_WC_Mixed_2015 |
| rs197422 | 0.02 | 0.0044 | 3.50E-06 | Waist circumference | GIANT_WC_EUR_2015 |
| rs197422 | 0.01303 | 0.002218 | 4.29E-09 | Waist circumference | Neale-B_UKBB_EUR_2017 |
| rs197422 | 0.025 | 0.0054 | 3.10E-06 | Waist circumference in females | GIANT_WC-F_Mixed_2015 |
| rs197422 | 0.035 | 0.0071 | 1.16E-06 | Waist circumference in females | GIANT_WC-F_EUR_2013 |
| rs13135092 | -0.02841 | 0.003864 | 1.96E-13 | Weight | Neale-B_UKBB_EUR_2017 |
| rs197422 | 0.01314 | 0.002188 | 1.93E-09 | Weight | Neale-B_UKBB_EUR_2017 |
| rs13135092 | -0.04173 | 0.004316 | 4.13E-22 | Whole body fat mass | Neale-B_UKBB_EUR_2017 |
| rs13136239 | -0.01337 | 0.002496 | 8.42E-08 | Whole body fat mass | Neale-B_UKBB_EUR_2017 |
| rs197422 | 0.01316 | 0.002443 | 7.18E-08 | Whole body fat mass | Neale-B_UKBB_EUR_2017 |
| rs197422 | 0.008271 | 0.001584 | 1.77E-07 | Whole body fat-free mass | Neale-B_UKBB_EUR_2017 |
| rs197422 | 0.008221 | 0.001586 | 2.18E-07 | Whole body water mass | Neale-B_UKBB_EUR_2017 |
| rs6770476 | -0.00724 | 0.001332 | 5.53E-08 | Worrier or anxious feelings | Neale-B_UKBB_EUR_2017 |
| rs11786084 | -0.014 | 0.003 | 4.42E-08 | Years of educational attainment | SSGAC_EduYears_EUR_2016 |
| rs13136239 | 0.015 | 0.003 | 8.49E-09 | Years of educational attainment | SSGAC_EduYears_EUR_2016 |
| rs11786084 | -0.017 | 0.004 | 7.37E-07 | Years of educational attainment in females | SSGAC_EduYears-F_EUR_2016 |
| rs13136239 | 0.015 | 0.003 | 9.10E-06 | Years of educational attainment in females | SSGAC_EduYears-F_EUR_2016 |

Figure S1. **a**. Leave-one-out of SNPs associated with multi-site chronic pain on obstructive sleep apnea; **b**. Funnel plot of SNPs associated with multi-site chronic pain on obstructive sleep apnea.


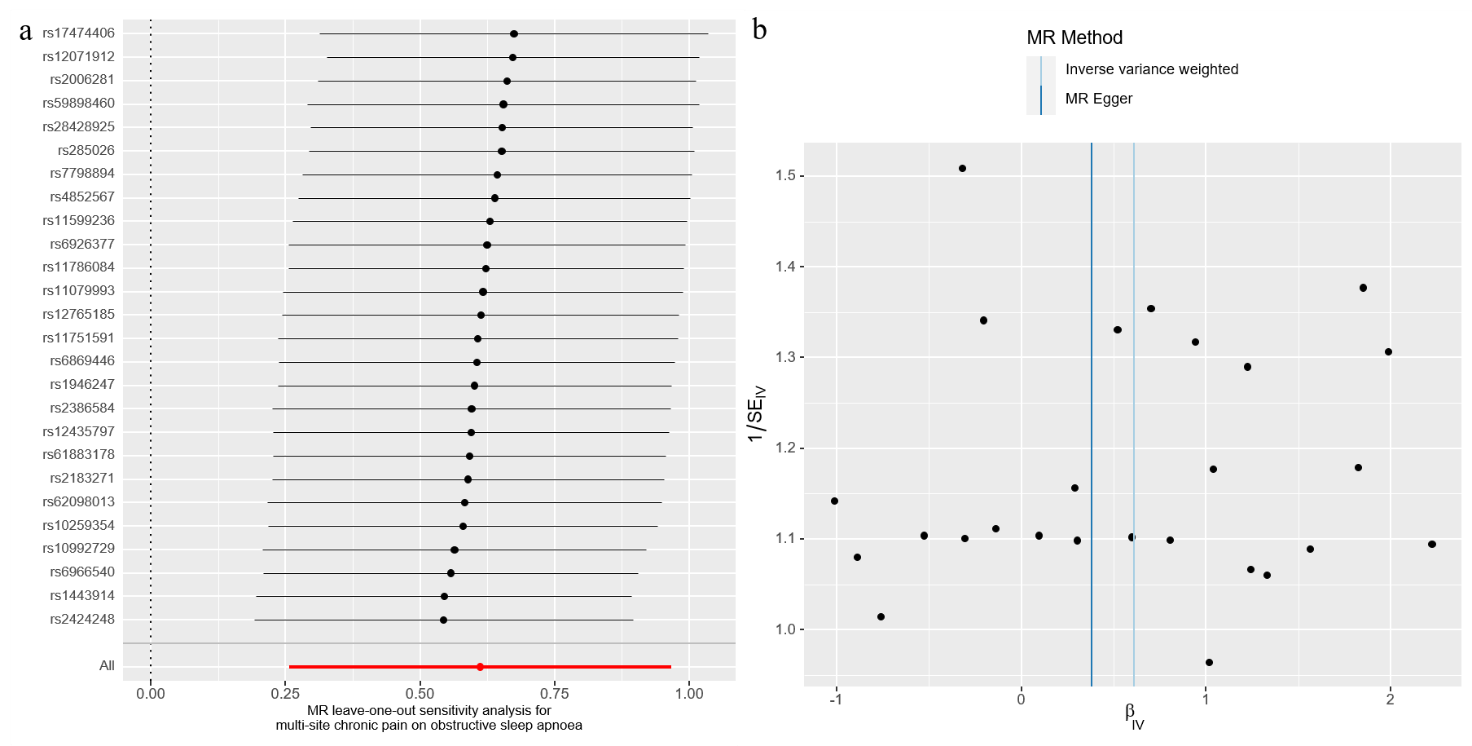

Supplement: Supplementary file 1 [file get_supplementary_file.php]
